# Supplementary material for: Design and synthesis of a new dimeric xanthone derivative: enhancement of G-quadruplex selectivity and telomere damage
Source: Royal Society of Chemistry journal article supplement (doi:10.1039/c4ob01658k), 2014-01-01
Supplement: c4ob01658k1.pdf [file c4ob01658k1.pdf]

## Electronic Supplementary Information

### Organic & Biomolecular Chemistry

#### Design and synthesis of a new dimeric xanthone derivative: enhancement of G-quadruplex selectivity and telomere damage.

Marco Franceschin(1)\*, Daniele Nocioni(1), Annamaria Biroccio(2), Emanuela Micheli(3,4), Stefano Cacchione(3,4), Chiara Cingolani(2), Alessandro Venditti (1), Pasquale Zizza(2), Armandodoriano Bianco(1), Alessandro Altieri(1)\*

1) University of Rome "Sapienza", Department of Chemistry, Piazzale Aldo Moro 5, Roma 00185, Italy

2) Experimental Chemotherapy Laboratory, Regina Elena National Cancer Institute;

3) University of Rome "Sapienza", Department of Biology and Biotechnology "Charles Darwin", Piazzale Aldo Moro 5, Roma 00185, Italy

4) Istituto Pasteur-Fondazione Cenci-Bolognetti, Piazzale Aldo Moro 5, Roma 00185, Italy

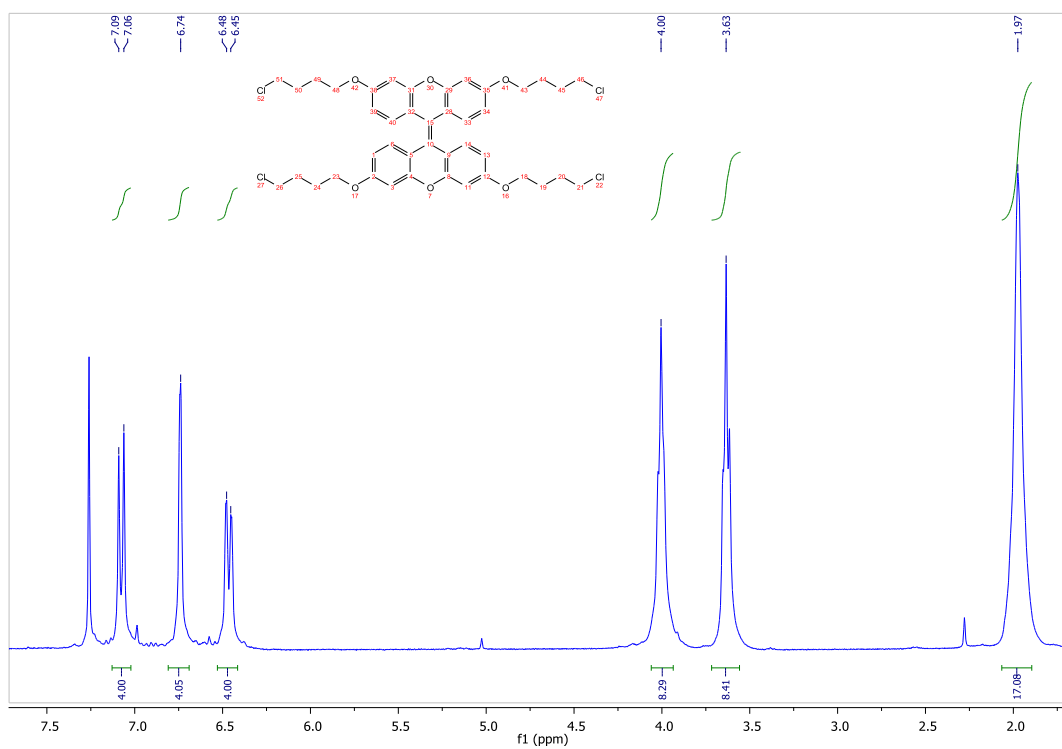

Figure 1:  $^3\text{H-NMR}$  of compound **3** ( $\text{CDCl}_3$ )

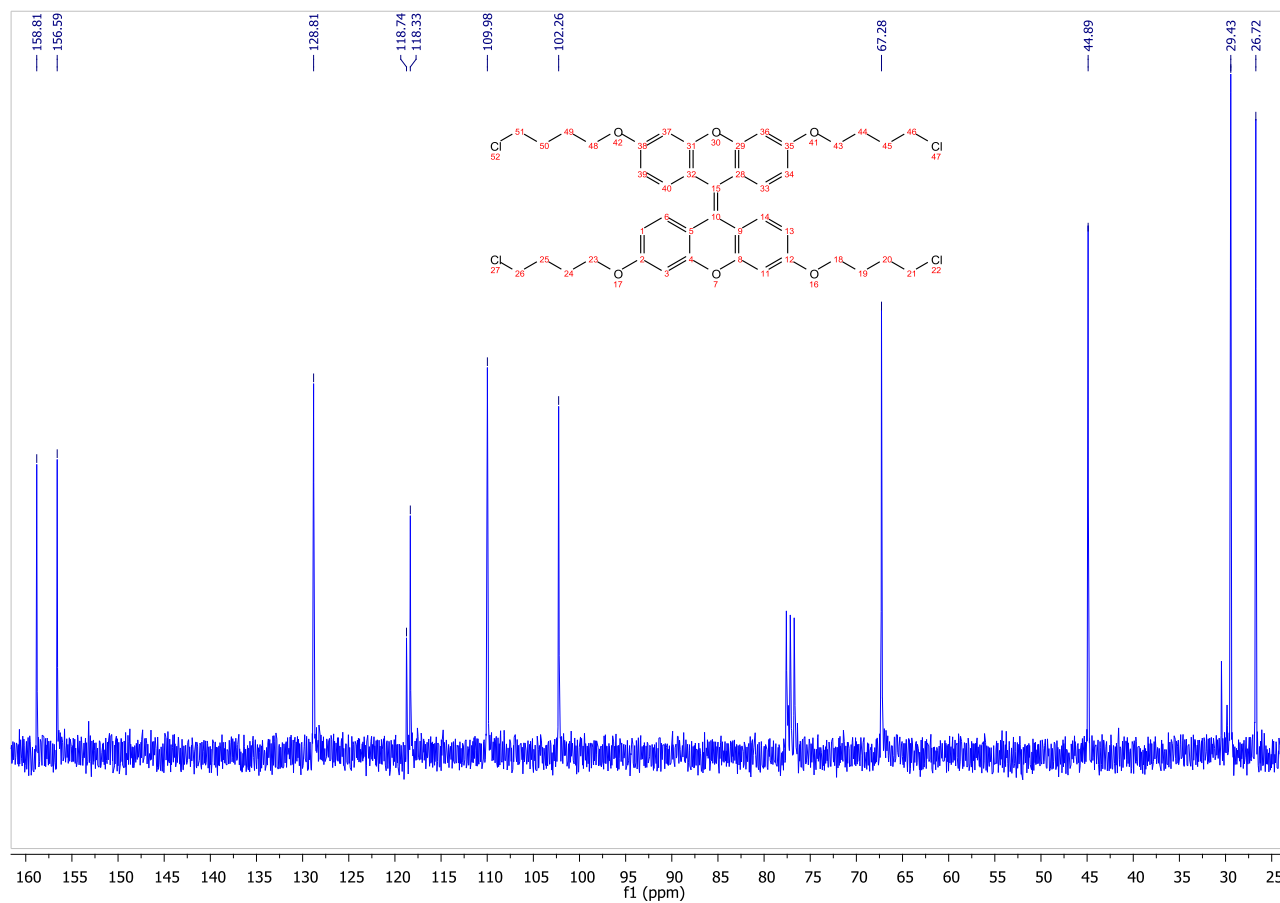

Figure 2:  $^{13}\text{C-NMR}$  spectra of compound **3** ( $\text{CDCl}_3$ )

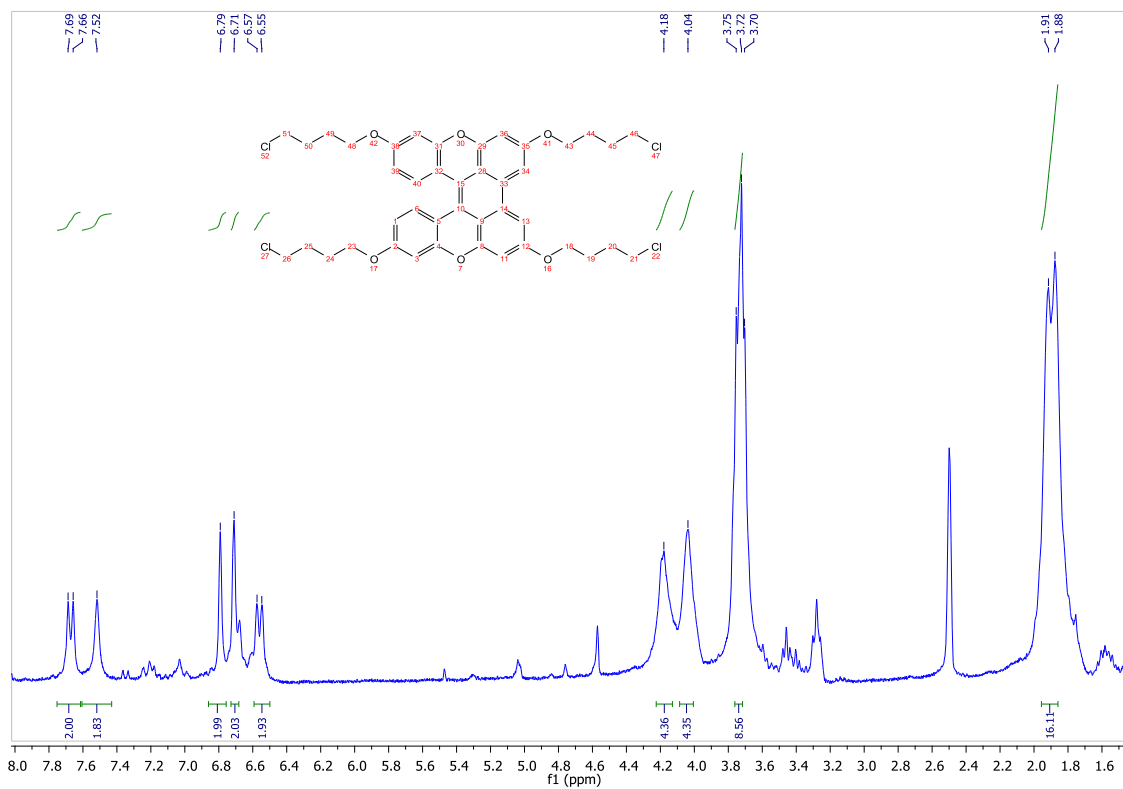

Figure 1:  $^1\text{H}$ -NMR of compound **4** ( $\text{CDCl}_3$ )

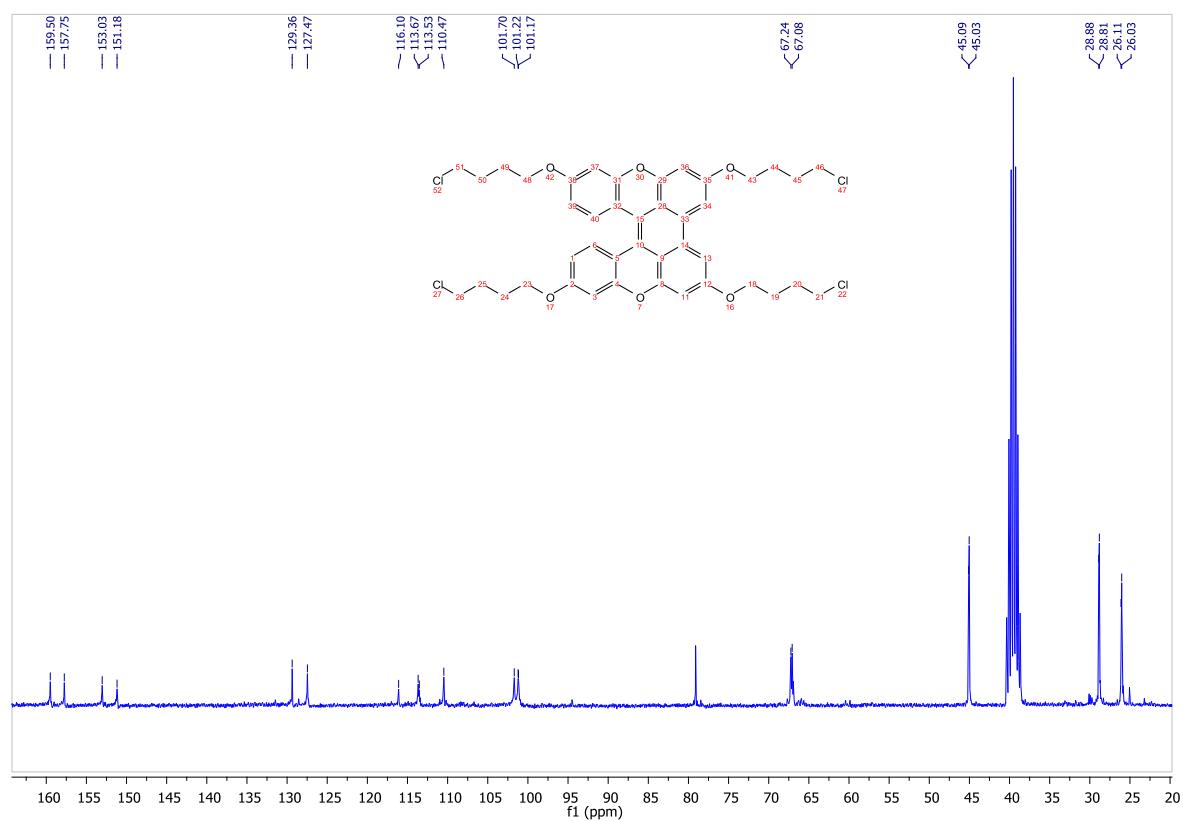

Figure 4:  $^{13}\text{C}$ -NMR spectra of compound **4** ( $\text{CDCl}_3$ )

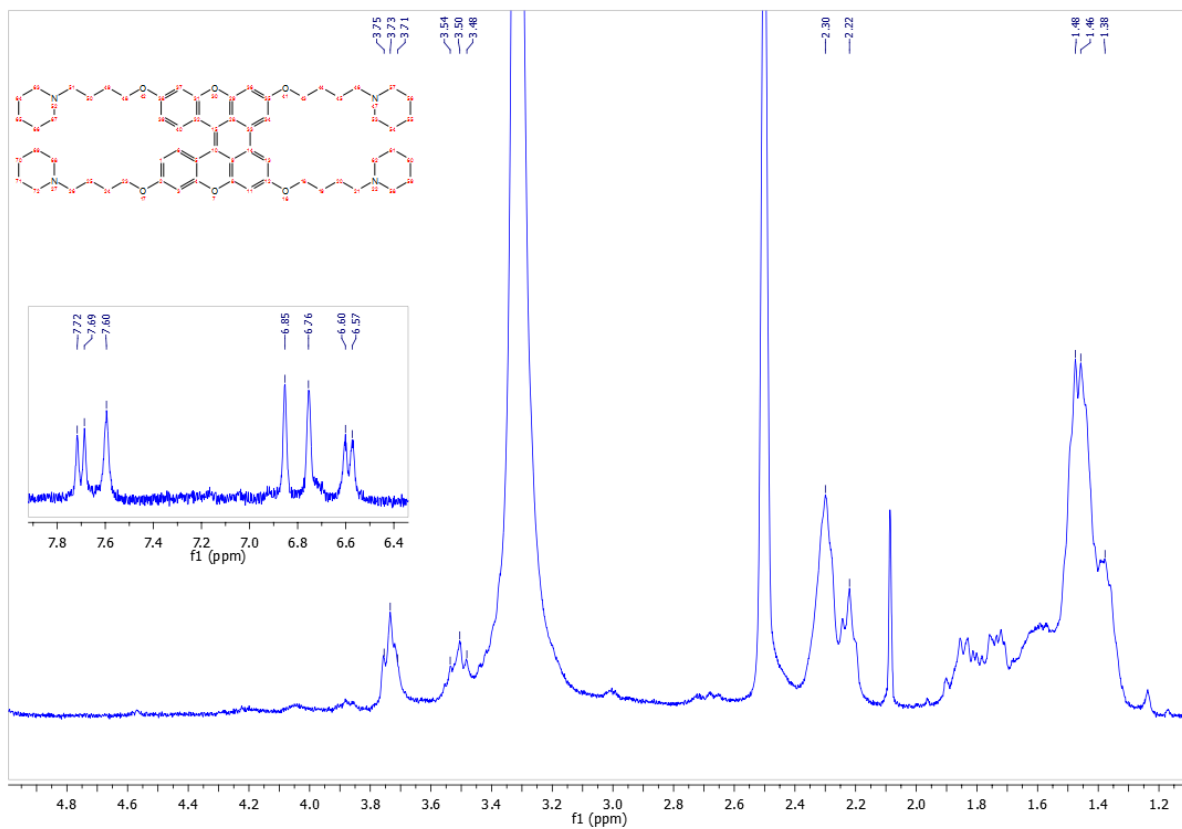

Figure 5:  $^1\text{H-NMR}$  of **HELIXA4C** (dimer) (MeOH)

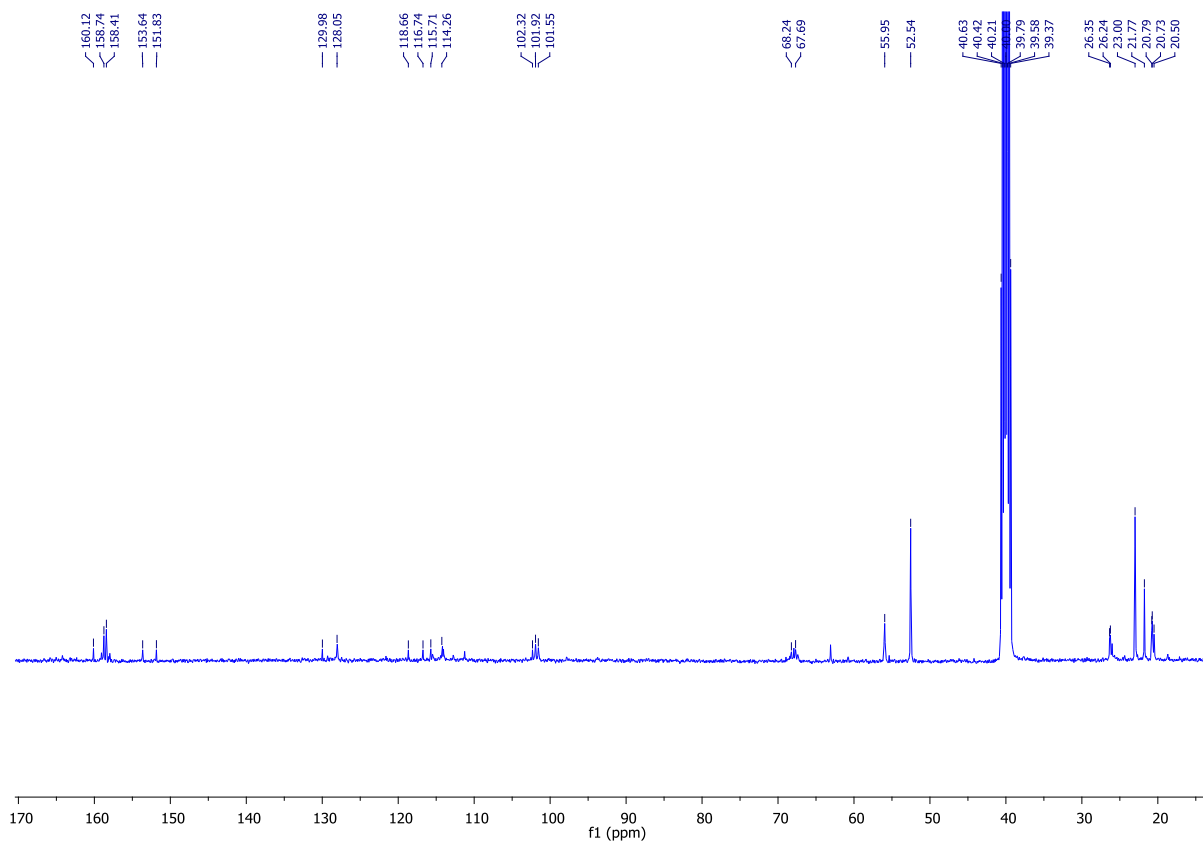

Figure 6:  $^{13}\text{C-NMR}$  spectra of **HELIXA4C** (dimer) (MeOH)

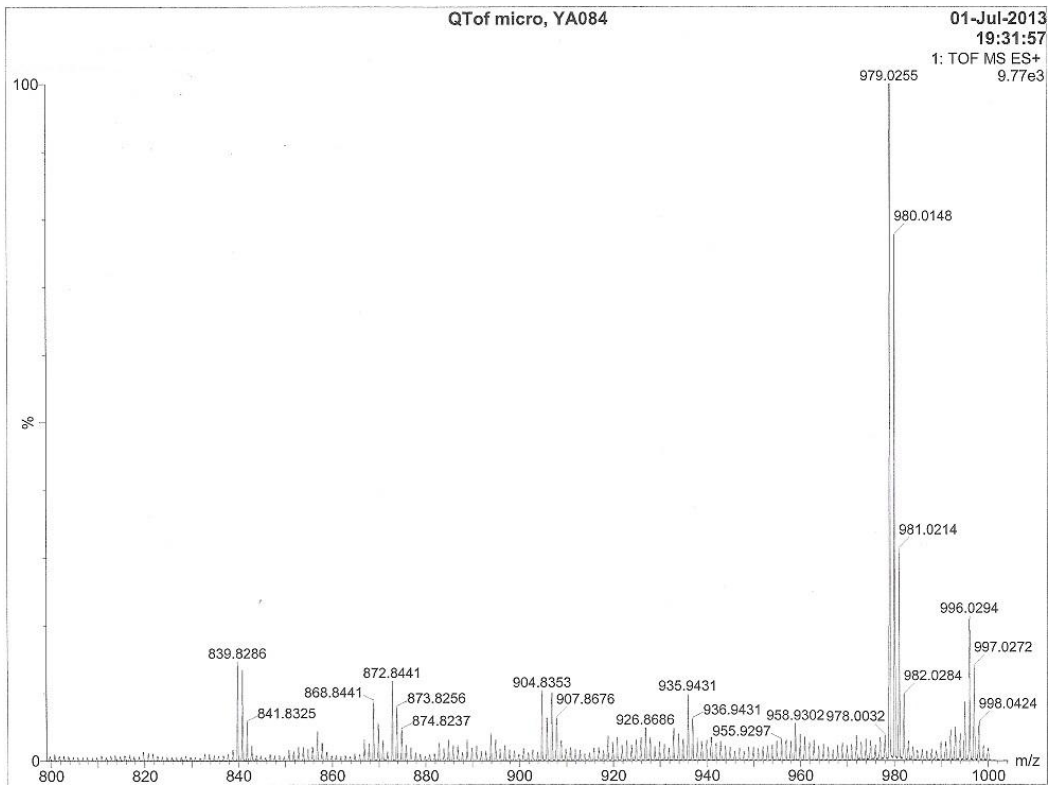

Figure 7: ESI mass spectra of compound HELIXA4C (dimer)

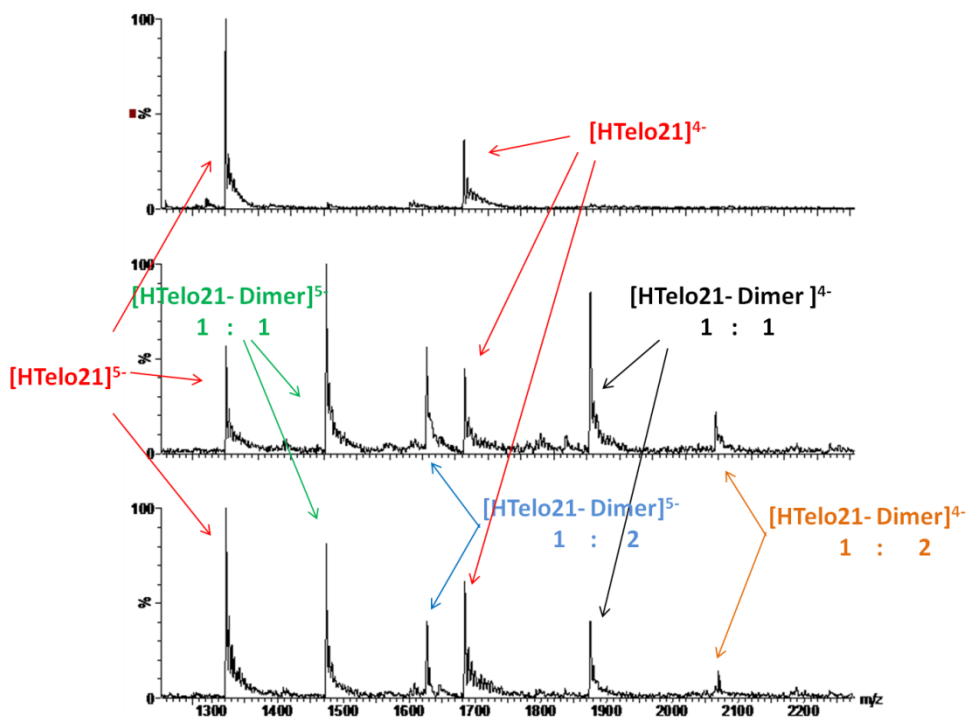

Figure 8: Competition experiments on HTelo21 oligo. ESI mass spectra of HTelo21 oligo in the presence of HELIXA4C (dimer) at 1 : 1 molar ratio and calf thymus DNA at 1 : 1 quadruplex/duplex ratio (in phosphate ions) UP: Human HTelo21 oligo alone; MIDDLE: Human HTelo21 oligo in presence of HELIXA4C(dimer); DOWN: Competition in presence of CT.
